# Supplementary material
Source: MDPI journal article supplement (https://www.mdpi.com/2072-4292/8/3/175)

# Supplementary Materials: Automated Detection of Forest Gaps in Spruce Dominated Stands Using Canopy Height Models Derived from Stereo Aerial Imagery. *Remote Sensing* 2016, 8, Article No.

Katarzyna Zielewska-Büttner, Petra Adler, Michaela Ehmann and Veronika Braunisch

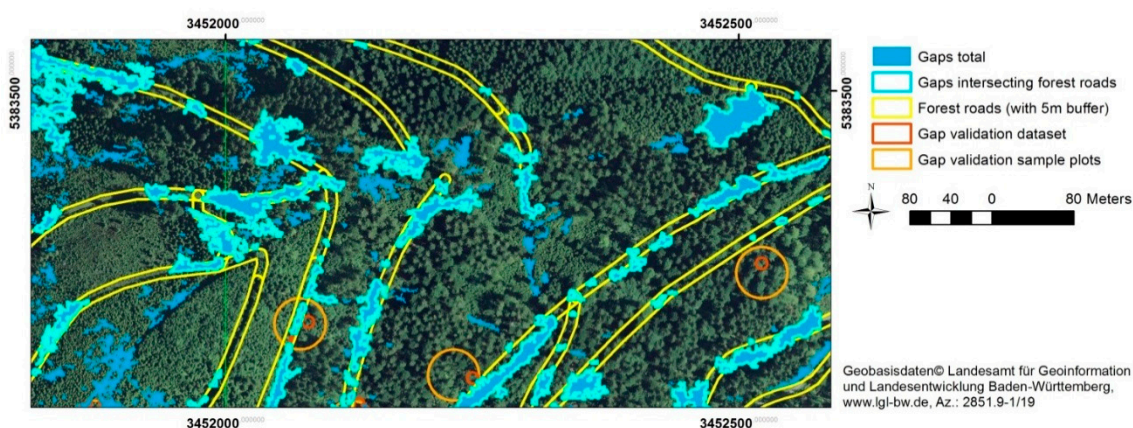

**Figure S1.** Example for the verification of gaps mapped in 2012 on and next to forest roads (gaps intersecting 5 m buffer of the road centerline selected by location).

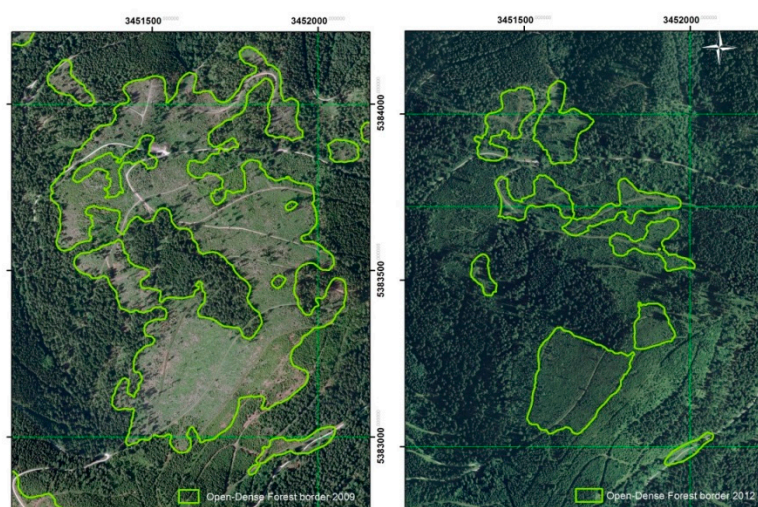

**Figure S2.** Example of the results of delimiting open forest (delineated in light green) within a dense forest matrix in 2009 (right) and 2012 (left).

**Table S3.** Confusion Matrix for evaluating the automated determination of open forest (OF) and dense forest (DF) with the results of visual classification.

| Automated Mapping | Visual Reference |    |       |      |    |       |
|-------------------|------------------|----|-------|------|----|-------|
|                   | 2009             |    |       | 2012 |    |       |
|                   | OF               | DF | Total | OF   | DF | Total |
| OF                | 37               | 3  | 40    | 40   | 0  | 40    |
| DF                | 3                | 37 | 40    | 6    | 34 | 40    |
| Total             | 40               | 40 | 80    | 46   | 34 | 80    |

**Table S4.** Descriptive statistics for low (LF < 8 m) and high (HF ≥ 8 m) forest stands mapped in 2009 and 2012.

| Statistics                     | 2009      |           | 2012      |           |
|--------------------------------|-----------|-----------|-----------|-----------|
|                                | LF        | HF        | LF        | HF        |
| N                              | 82        | 18        | 70        | 22        |
| Minimum size (m <sup>2</sup> ) | 3020      | 3046      | 3126      | 3874      |
| Maximum size (m <sup>2</sup> ) | 659,404   | 6,177,173 | 834,811   | 7,383,150 |
| Mean size (m <sup>2</sup> )    | 21,340    | 424,257   | 30,180    | 355,155   |
| Median size (m <sup>2</sup> )  | 6147      | 8957      | 5534      | 11,478    |
| Interquartile 25%              | 4237      | 3981      | 4283      | 5272      |
| Interquartile 75%              | 12,384    | 60,830    | 17,422    | 27,214    |
| SD (m <sup>2</sup> )           | 74,429    | 1,417,558 | 10,5212   | 1,533,808 |
| Sum area (m <sup>2</sup> )     | 1,749,919 | 7,636,625 | 2,112,599 | 7,813,413 |

**Table S5.** Descriptive statistics of gap mapping results per year (including gaps persisting in both years) and forest type (low (LF) and high (HF) forest and in total).

| Statistics                    | 2009    |         |         | 2012    |         |         | Persisting Gaps 2009–2012 |        |         |
|-------------------------------|---------|---------|---------|---------|---------|---------|---------------------------|--------|---------|
|                               | LF      | HF      | Total   | LF      | HF      | Total   | LF                        | HF     | Total   |
| N                             | 2401    | 2174    | 4575    | 3088    | 1579    | 4667    | 1330                      | 652    | 2765    |
| Density (N/ha)                | 13.7    | 2.8     | 4.9     | 14.6    | 2.0     | 4.7     | 6.3                       | 0.8    | 13.1    |
| Min size (m <sup>2</sup> )    | 10      | 10      | 10      | 10      | 10      | 10      | 1                         | 1      | 1       |
| Max size (m <sup>2</sup> )    | 19,091  | 2105    | 19,091  | 12,556  | 2495    | 12,556  | 4129                      | 1437   | 4129    |
| Mean size (m <sup>2</sup> )   | 188     | 113     | 152     | 151     | 98      | 133     | 130                       | 66     | 101     |
| Median size (m <sup>2</sup> ) | 29      | 36      | 32      | 26      | 27      | 27      | 57                        | 62     | 65      |
| Interquartile 25%             | 16      | 17      | 16      | 15      | 15      | 15      | 18                        | 22     | 20      |
| Interquartile 75%             | 81      | 99      | 89      | 73      | 80      | 75      | 365                       | 230    | 329     |
| SD (m <sup>2</sup> )          | 699     | 221     | 530     | 545     | 215     | 461     | 367                       | 137    | 283     |
| Total area (m <sup>2</sup> )  | 450,722 | 246,026 | 696,748 | 465,853 | 155,418 | 621,271 | 173,296                   | 43,169 | 279,593 |
| Coverage (m <sup>2</sup> /ha) | 2576    | 322     | 742     | 2205    | 199     | 626     | 820                       | 55     | 1323    |

**Table S6.** Shadow occurrence statistics (yes = shadow, in division to “partial” and “full” shadow coverage) in areas of visually identified and not automatically mapped gaps in 2009 and 2012.

| Year                                                 | 2009 |        |         |      | 2012 |        |         |      |
|------------------------------------------------------|------|--------|---------|------|------|--------|---------|------|
|                                                      | No   | Shadow |         |      | No   | Shadow |         |      |
|                                                      |      | Yes    | Partial | Full |      | Yes    | Partial | Full |
| No of visually and not automatically identified gaps | 4    | 27     | 20      | 7    | 19   | 38     | 27      | 17   |
| % of visually and not automatically identified gaps  | 13   | 87     | 21      | 74   | 30   | 70     | 27      | 43   |

**Table S7.** Statistics of “No-data” raster cells located within the evaluation plots for gap validation in 2009 and 2012.

| Year                                                       | 2009         | 2012        |
|------------------------------------------------------------|--------------|-------------|
| “No-data” cells (no.)/% of total cells in evaluation plots | 4107 (12.2%) | 3015 (8.8%) |
| N of “no-data” cell groups (region group with 8 neighbors) | 916          | 918         |
| Max. no. of no cells in a group                            | 77           | 74          |
| Mean group size (N of no value cells)                      | 4.5          | 4.5         |
| Other raster cells                                         | 29,484       | 31,146      |
| Total cells in the gap evaluation plots                    | 33,591       | 34,161      |

**Table S8.** Types of gaps (in regard to their location within a forest stand (0), on a storm throw (1), on a road (2), next to open forest (3), on a skidding trail (4) and next to a road or a skidding trail(5)) identified during the visual validation in 2009 and 2012.

| Gap Type                                          | 2009 |    | 2012 |    |
|---------------------------------------------------|------|----|------|----|
|                                                   | No   | %  | No   | %  |
| Gap within a forest stand (0)                     | 107  | 54 | 114  | 50 |
| Gap on a storm throw (1)                          | 1    | 0  | 13   | 6  |
| Gap on a road (2)                                 | 40   | 20 | 54   | 23 |
| Gap next to an open forest (3)                    | 11   | 6  | 1    | 0  |
| Gap on a skidding trail (4)                       | 20   | 10 | 31   | 13 |
| Gap next to road or skidding trail (5)            | 18   | 9  | 17   | 7  |
| Gaps on or next to road or skidding trail (2,4,5) | 78   | 39 | 102  | 43 |
| Total                                             | 197  | 99 | 230  | 99 |

**Table S9.** Statistics for gaps mapped on or next to forest roads (all gaps intersecting the 5 m buffer from the forest road line).

| Year | Forest Height Class | Gaps |                        | Gap area (m <sup>2</sup> ) |                       |      |        |     |
|------|---------------------|------|------------------------|----------------------------|-----------------------|------|--------|-----|
|      |                     | N    | % of All Gaps in Class | Sum                        | % of Total Class Area | Mean | Range  | SD  |
| 2009 | LF                  | 663  | 28                     | 362,328                    | 80                    | 87.6 | 0-6314 | 286 |
|      | HF                  | 806  | 37                     | 164,628                    | 67                    | 44.5 | 0-1114 | 88  |
| 2012 | LF                  | 760  | 25                     | 343,053                    | 74                    | 72.3 | 0-3108 | 211 |
|      | HF                  | 547  | 35                     | 120,369                    | 77                    | 40.2 | 0-1020 | 88  |

**Table S10.** Basic statistics of gaps mapped not on or next to roads (solely within forest stands) in low (LF) and high (HF) forest height classes in 2009 and 2012.

| Year | Forest Height Class | Gaps |                    | Gap Area (m <sup>2</sup> ) |                                      |      |
|------|---------------------|------|--------------------|----------------------------|--------------------------------------|------|
|      |                     | N    | Gap Density (N/ha) | Sum                        | Gap Area per ha (m <sup>2</sup> /ha) | Mean |
| 2009 | LF                  | 1738 | 9.9                | 88,650                     | 80                                   | 51   |
|      | HF                  | 1368 | 1.8                | 80,274                     | 67                                   | 59   |
| 2012 | LF                  | 2328 | 11.0               | 122,846                    | 74                                   | 53   |
|      | HF                  | 1032 | 1.3                | 35,130                     | 77                                   | 34   |

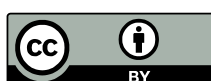

Supplement: s1 [file s1]
